# Supplementary material for: Antimicrobial Resistance and Virulence Factors Assessment in Escherichia coli Isolated from Swine in Italy from 2017 to 2021
Source: MDPI journal article supplement (doi:10.3390/pathogens12010112), 2023-01-09
Supplement: s1 [file s1]

Supplementary Material

# Antimicrobial Resistance and Virulence Factors Assessment in *Escherichia coli* Isolated from Swine in Italy from 2017 to 2021

**Table S1.** Different combination of adhesins and toxins of 457 ETEC isolates, N: number and (%): percentage. STa: heat-stable toxin a; STb: heat-stable toxin b; LT: heat-labile toxin; Stx2e: Shiga toxin 2e.

| Adhesins |    | Toxins |    |     |    |     |     |          |   |         |   |            |    |         |    |              |    |                 |   |                     |
|----------|----|--------|----|-----|----|-----|-----|----------|---|---------|---|------------|----|---------|----|--------------|----|-----------------|---|---------------------|
|          |    | STa    |    | STb |    | LT  |     | STa, STb |   | STa, LT |   | STa, Stx2e |    | STb, LT |    | STa, STb, LT |    | STa, STb, Stx2e |   | STa, STb, LT, Stx2e |
|          | N  | (%)    | N  | (%) | N  | (%) | N   | (%)      | N | (%)     | N | (%)        | N  | (%)     | N  | (%)          | N  | (%)             | N | (%)                 |
| F18      | 20 | 4.4    | 6  | 1.3 | 1  | 0.2 | 136 | 29.8     | 4 | 0.9     | 7 | 1.5        | 1  | 0.2     | 30 | 6.6          | 22 | 4.8             | 3 | 0.7                 |
| F4       | 7  | 1.5    | 12 | 2.6 | 10 | 2.2 | 40  | 8.8      | 8 | 1.8     | - | -          | 32 | 7       | 35 | 7.7          | -  | -               | - | -                   |
| F5       | 15 | 3.3    | 2  | 0.4 | 1  | 0.2 | 2   | 0.4      | 1 | 0.2     | - | -          | -  | -       | 1  | 0.2          | -  | -               | - | -                   |
| F4 F18   | 3  | 0.7    | 1  | 0.2 | -  | -   | 14  | 3.1      | - | -       | - | -          | -  | -       | 3  | 0.7          | -  | -               | - | -                   |
| F41      | 8  | 1.8    | 6  | 1.3 | -  | -   | 5   | 1.1      | - | -       | - | -          | -  | -       | -  | -            | -  | -               | - | -                   |
| F5 F41   | 14 | 3.1    | -  | -   | -  | -   | -   | -        | - | -       | - | -          | -  | -       | -  | -            | -  | -               | - | -                   |
| F6       | 1  | 0.2    | 2  | 0.4 | 1  | 0.2 | 1   | 0.2      | - | -       | - | -          | -  | -       | -  | -            | -  | -               | - | -                   |
| F4 F6    | -  | -      | -  | -   | -  | -   | -   | -        | - | -       | - | -          | 1  | 0.2     | -  | -            | -  | -               | - | -                   |
| F5 F6    | -  | -      | -  | -   | -  | -   | 1   | 0.2      | - | -       | - | -          | -  | -       | -  | -            | -  | -               | - | -                   |

**Table S2.** Percentage (%) of resistance to selected antibiotics from 2017 to 2021 and statistical analysis of observed variations (*r*) listed for all the 826 *E. coli* isolated from swine pathologic samples, and for F18+ and F4+ isolates. Nalidixic acid (NA), amoxicillin and clavulanic acid (AMC), ampicillin (AMP), cefazolin (CZ), enrofloxacin (ENR), florfenicol (FFC); gentamicin (GEN), kanamycin (KAN), tetracycline (TET), trimethoprim + sulfamethoxazole (SXT).

| Antibiotics        | % of resistant strains |      |      |      |      | Statistical analysis |        |
|--------------------|------------------------|------|------|------|------|----------------------|--------|
| Year of isolation  | 2017                   | 2018 | 2019 | 2020 | 2021 | r                    | p      |
| NA                 | 84.1                   | 73.6 | 68.7 | 69.3 | 74.2 | -0.62                | >0.05  |
| AMC                | 61.7                   | 52.8 | 63.1 | 68.9 | 74.2 | 0.88                 | >0.05  |
| AMP                | 93.5                   | 94.4 | 95.9 | 96.1 | 99.2 | 0.96                 | <0.05* |
| CZ                 | 73.8                   | 83.2 | 78.3 | 80.5 | 79.2 | 0.37                 | >0.05  |
| ENR                | 64.5                   | 64.8 | 54.4 | 51   | 60.8 | -0.54                | >0.05  |
| FFC                | 61.7                   | 65.6 | 63.1 | 62.3 | 69.2 | 0.60                 | >0.05  |
| GEN                | 58.9                   | 55.2 | 64.5 | 61.9 | 63.3 | 0.66                 | >0.05  |
| KAN                | 48.6                   | 54.4 | 63.1 | 63   | 59.2 | 0.76                 | >0.05  |
| TET                | 92.5                   | 96   | 92.6 | 85.2 | 85   | -0.83                | >0.05  |
| SXT                | 70.1                   | 73.6 | 78.8 | 75.1 | 72.5 | 0.31                 | >0.05  |
| N° tested isolates | 107                    | 125  | 217  | 257  | 120  |                      |        |

  

| Antibiotics -     | % of resistances of F18+ strains |      |      |      |      | Statistical analysis |        |
|-------------------|----------------------------------|------|------|------|------|----------------------|--------|
| Year of isolation | 2017                             | 2018 | 2019 | 2020 | 2021 | r                    | p      |
| NA                | 90                               | 79.4 | 68.4 | 77.6 | 91.7 | 0.03                 | >0.05  |
| AMC               | 50                               | 38.2 | 59.2 | 65.8 | 79.2 | 0.87                 | >0.05  |
| AMP               | 95                               | 97.1 | 96.1 | 93.4 | 95.8 | -0.23                | >0.05  |
| CZ                | 65                               | 91.2 | 73.7 | 75   | 83.3 | 0.32                 | >0.05  |
| ENR               | 55                               | 79.4 | 42.1 | 48.7 | 54.2 | -0.36                | >0.05  |
| FFC               | 70                               | 79.4 | 80.3 | 81.6 | 95.8 | 0.92                 | <0.05* |
| GEN               | 70                               | 79.4 | 80.3 | 78.9 | 91.7 | 0.88                 | <0.05* |

| KAN                | 50   | 50                              | 71.1 | 69.7 | 91.7 | 0.94                 | <0.05* |
|--------------------|------|---------------------------------|------|------|------|----------------------|--------|
| TET                | 95   | 100                             | 96.1 | 90.8 | 87.5 | -0.79                | >0.05  |
| SXT                | 65   | 88.2                            | 88.2 | 85.5 | 83.3 | 0.55                 | >0.05  |
| N° tested isolates | 20   | 34                              | 76   | 76   | 24   |                      |        |
| Antibiotics -      |      | % of resistances of F4+ strains |      |      |      | Statistical analysis |        |
| Year of isolation  | 2017 | 2018                            | 2019 | 2020 | 2021 | r                    | p      |
| NA                 | 88   | 85.2                            | 67.5 | 73   | 93.3 | -0.02                | >0.05  |
| AMC                | 60   | 55.6                            | 60   | 59.5 | 73.3 | 0.71                 | >0.05  |
| AMP                | 96   | 92.6                            | 95   | 94.6 | 100  | 0.58                 | >0.05  |
| CZ                 | 88   | 81.5                            | 77.5 | 83.8 | 66.7 | -0.79                | >0.05  |
| ENR                | 72   | 66.7                            | 57.5 | 59.5 | 73.3 | -0.10                | >0.05  |
| FFC                | 60   | 66.7                            | 55   | 62.2 | 73.3 | 0.51                 | >0.05  |
| GEN                | 60   | 51.9                            | 47.5 | 64.9 | 66.7 | 0.50                 | >0.05  |
| KAN                | 48   | 55.6                            | 50   | 59.5 | 60   | 0.81                 | >0.05  |
| TET                | 92   | 96.3                            | 82.5 | 75.7 | 86.7 | -0.61                | >0.05  |
| SXT                | 68   | 51.9                            | 60   | 59.5 | 73.3 | 0.35                 | >0.05  |
| N° tested isolates | 25   | 27                              | 40   | 37   | 15   |                      |        |

\*the trend was considered statistically significant for  $p < 0.05$

**Table S3.** Percentages (%) of *E. coli* F4+ isolates simultaneously resistant to n° antibiotics (from 1 to 10) and to  $\geq 6$  antibiotics (multiresistant) from 2017 to 2021. Nalidixic acid (NA), amoxicillin and clavulanic acid (AMC), ampicillin (AMP), cefazolin (CZ), enrofloxacin (ENR), florfenicol (FFC); gentamicin (GEN), kanamycin (KAN), tetracycline (TET) trimethoprim + sulfamethoxazole (SXT). The trend was considered statistically significant for  $p < 0.05$ .

| % of resistances to n° antibiotics of F4+ strains |       |                   |      |      |      |      |                      |       |
|---------------------------------------------------|-------|-------------------|------|------|------|------|----------------------|-------|
| n° antibiotics                                    | Total | Year of isolation |      |      |      |      | Statistical analysis |       |
|                                                   |       | 2017              | 2018 | 2019 | 2020 | 2021 | r                    | p     |
| 0                                                 | 0     | 0                 | 0    | 0    | 0    | 0    | -                    | -     |
| 1                                                 | 2.1   | 0                 | 3.7  | 2.5  | 2.7  | 0    | -0.09                | >0.05 |
| 2                                                 | 2.1   | 0                 | 0    | 2.5  | 5.4  | 0    | 0.36                 | >0.05 |
| 3                                                 | 7.6   | 4                 | 11.1 | 7.5  | 10.8 | 0    | -0.28                | >0.05 |
| 4                                                 | 6.3   | 8                 | 3.7  | 7.5  | 5.4  | 6.7  | -0.09                | >0.05 |
| 5                                                 | 6.3   | 12                | 3.7  | 7.5  | 2.7  | 6.7  | -0.50                | >0.05 |
| 6                                                 | 13.2  | 16                | 14.8 | 15   | 8.1  | 13.3 | -0.61                | >0.05 |
| 7                                                 | 14.6  | 8                 | 11.1 | 20   | 10.8 | 26.7 | 0.75                 | >0.05 |
| 8                                                 | 16.7  | 8                 | 14.8 | 22.5 | 21.6 | 6.7  | 0.09                 | >0.05 |
| 9                                                 | 14.6  | 28                | 22.2 | 5    | 10.8 | 13.3 | -0.70                | >0.05 |
| 10                                                | 16.7  | 16                | 14.8 | 10   | 21.6 | 26.7 | 0.69                 | >0.05 |
| >6                                                | 75.7  | 76                | 77.8 | 72.5 | 73   | 86.7 | 0.46                 | >0.05 |
| N° tested isolates                                | 144   | 25                | 27   | 40   | 37   | 15   |                      |       |

**Table S4.** Virulence factor genes specific primers [22]. Fimbriae (F), heat-labile toxin (LT); heat-stable toxin a (STa); heat-stable toxin b (STb); Shiga toxin (Stx).

| Virulence factor | F 5'-3'               | R 5'-3'               |
|------------------|-----------------------|-----------------------|
| F4               | GTTGGTACAGGTCTTAATGG  | GAATCTGTCCGAGAATATCA  |
| F5               | AATACTTGTTTCAGGGAGAAA | AACTTTGTGGTTAACTTCCT  |
| F6               | AAGTTACTGCCAGTCTATGC  | GTAACCTCCACCGTTTGTATC |
| F18              | TGGTAACGTATCAGCAACTA  | ACTTACAGTGCTATTTCGACG |
| F41              | AGTATCTGGTTCAGTGATGG  | CCACTATAAGAGGTTGAAGC  |
| LTb subunit      | GGCGTTACTATCCTCTCTAT  | TGGTCTCGGTCAGATATGT   |
| STaP             | CAACTGAATCACTTGACTCTT | TTAATAACATCCAGCACAGG  |
| STb              | TGCCTATGCATCTACACAAT  | CTCCAGCAGTACCATCTCTA  |
| Stx2e            | AATAGTATACGGACAGCGAT  | TCTGACATTCTGGTTGACTC  |

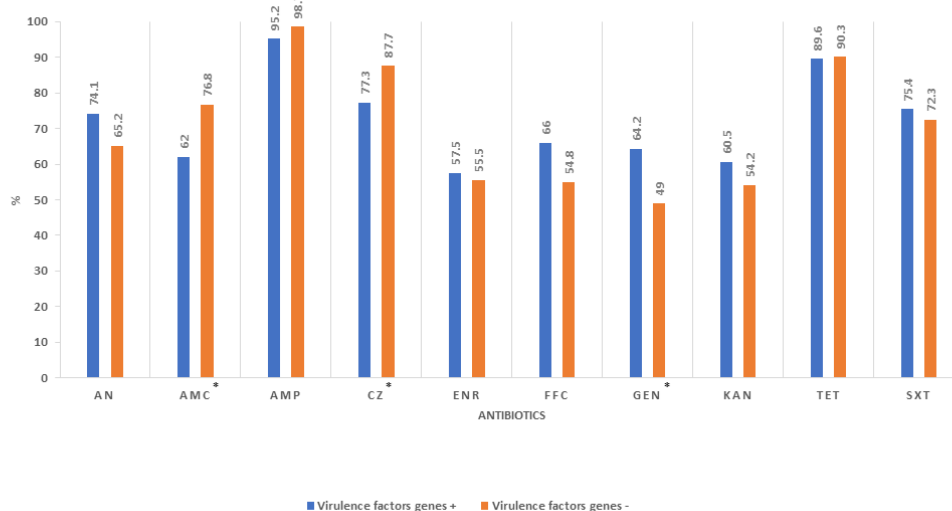**Figure S1.** Percentage of resistance to the tested antibiotics of virulence factor genes positive and negative *Escherichia coli*. Nalidixic acid (NA), amoxicillin and clavulanic acid (AMC), ampicillin (AMP), cefazolin (CZ), enrofloxacin (ENR), florfenicol (FFC); gentamicin (GEN), kanamycin (KAN), tetracycline (TET) trimethoprim + sulfamethoxazole (SXT). \* Percentage of isolates resistant to antimicrobials with  $p < 0.01$ .

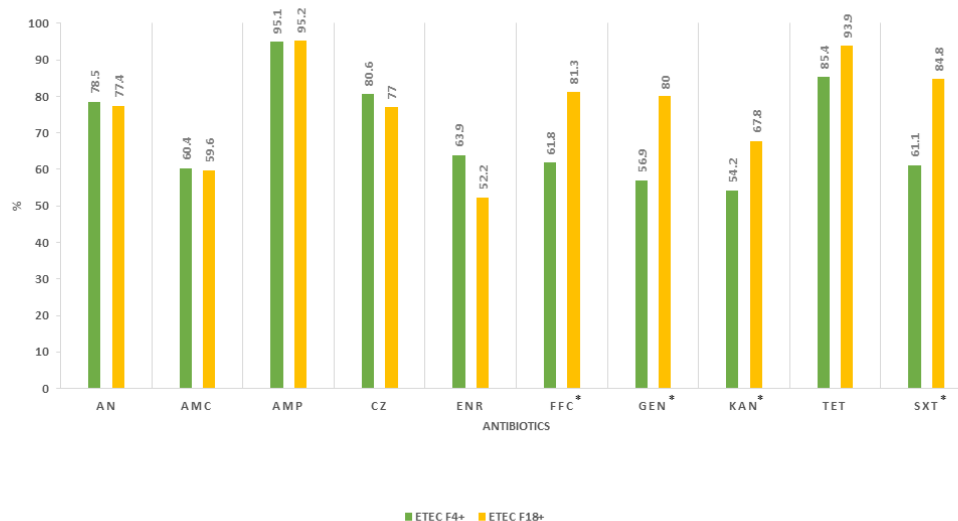

**Figure S2.** Percentage of resistance to the tested antibiotics of Enterotoxigenic *Escherichia coli* (ETEC) positive to Fimbrial factor (F) 4 or 18. Nalidixic acid (NA), amoxicillin and clavulanic acid (AMC), ampicillin (AMP), cefazolin (CZ), enrofloxacin (ENR), florfenicol (FFC); gentamicin (GEN), kanamycin (KAN), tetracycline (TET) trimethoprim + sulfamethoxazole (SXT). \* Percentage of isolates resistant to antimicrobials with  $p < 0.01$ .
